# Supplementary material
Source: PubMed Central journal article supplement (PMC1769555)

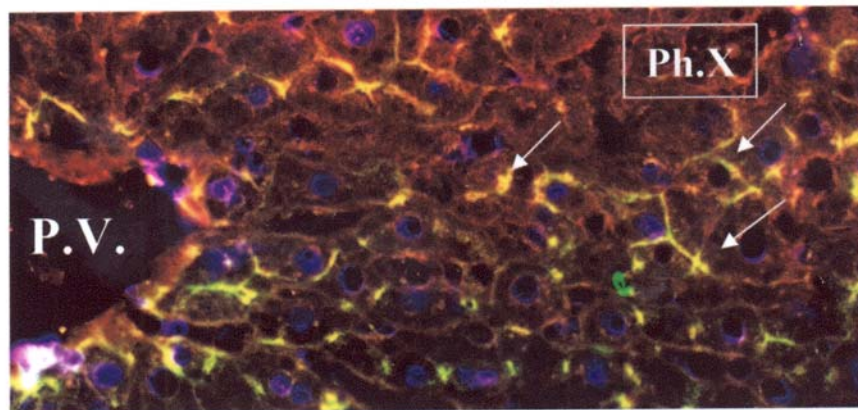

**A**

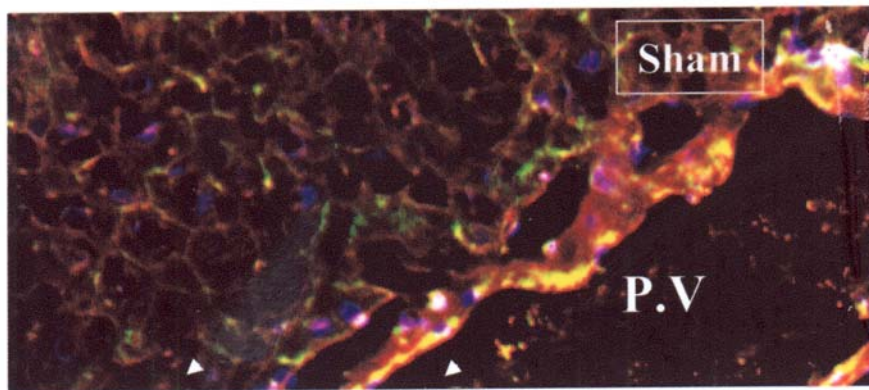

**B**

Supplement: NIHMS15744-supplement-fig1.pdf [file NIHMS15744-supplement-fig1.pdf]

(A)

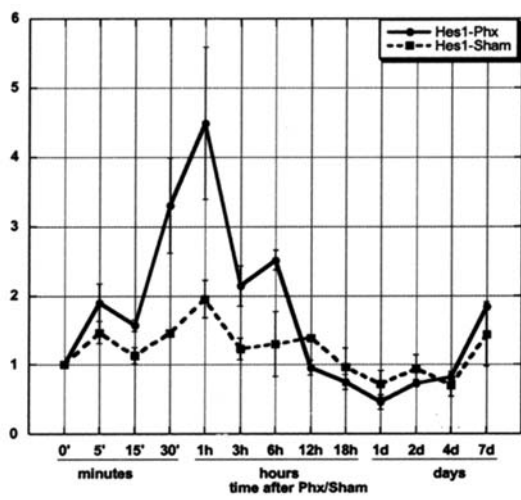

(B)

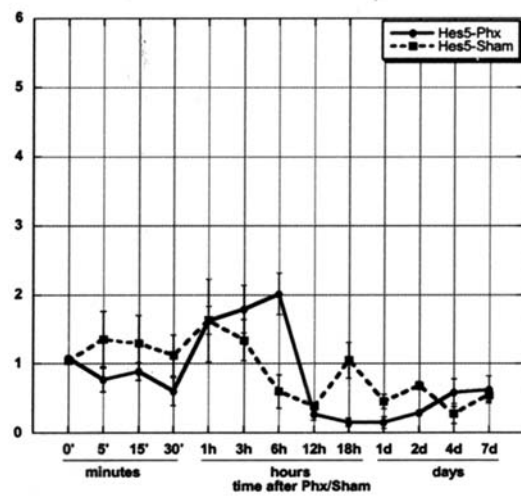

Supplement: NIHMS15744-supplement-fig2.pdf [file NIHMS15744-supplement-fig2.pdf]

(A)

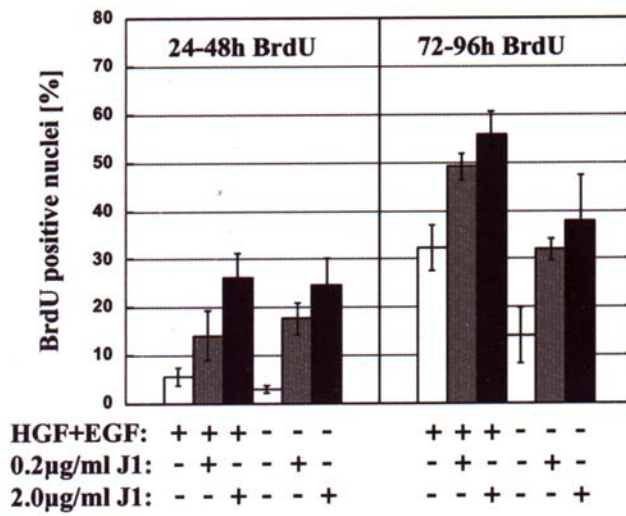

(B)

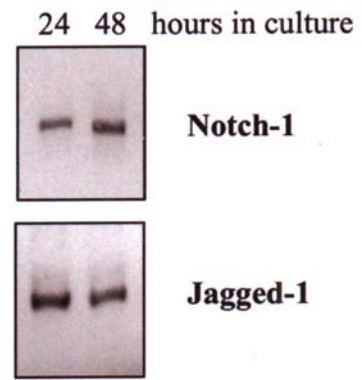

Supplement: NIHMS15744-supplement-fig3.pdf [file NIHMS15744-supplement-fig3.pdf]
